# Supplementary material for: On the photostability of peptides after selective photoexcitation of the backbone: prompt versus slow dissociation
Source: Royal Society of Chemistry journal article supplement (doi:10.1039/c4cp02015d), 2014-01-01
Supplement: c4cp02015d1.pdf [file c4cp02015d1.pdf]

## Supporting Information

### On the Photostability of Peptides after Selective Photoexcitation of the Backbone: Prompt versus Slow Dissociation

Camilla Skinnerup Byskov, Frank Jensen, Thomas J.D. Jørgensen, Steen Brøndsted Nielsen

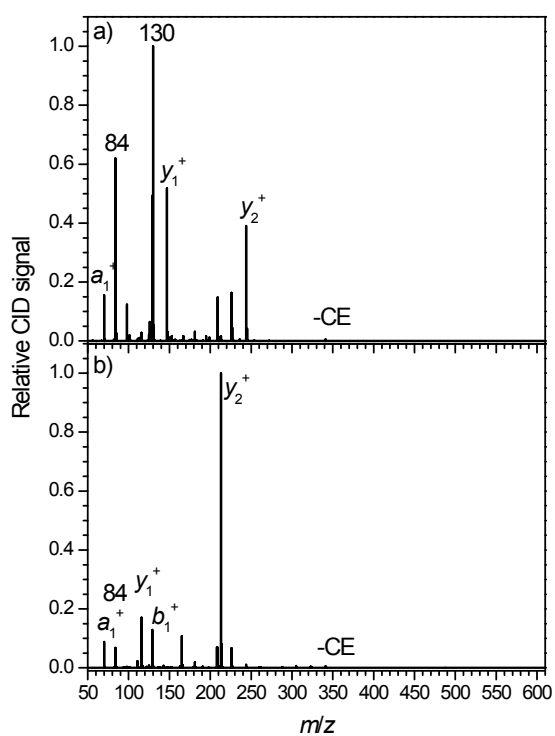

Low-energy CID spectra of (a)  $[\text{PPK}+\text{H}]^+(\text{CE})$  ( $m/z$  605), collision energy 60 eV in the laboratory frame and (b)  $[\text{KPP}+\text{H}]^+(\text{CE})$  ( $m/z$  605), collision energy 50 eV in the laboratory frame.

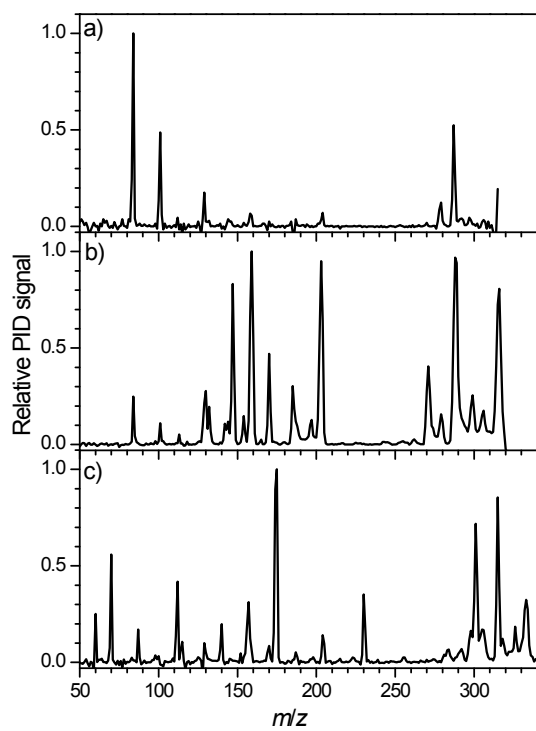

PID mass spectra of (a)  $[\text{KW}+\text{H}]^+$  ( $m/z$  333), (b)  $[\text{WK}+\text{H}]^+$  ( $m/z$  333) and (c)  $[\text{RW}+\text{H}]^+$  ( $m/z$  361),  $\lambda = 210$  nm.
